# Supplementary material for: Daytime versus Nighttime in Acute Appendicitis
Source: MDPI journal article supplement (doi:10.3390/diagnostics12040788), 2022-03-23
Supplement: s1 [file s1]

**Table S1.** All complications.

|                                          | All Appendicitis<br>(n = 1361) |                    |         | Uncomplicated Appendicitis<br>(n = 892) |                    |         | Complicated Appendicitis<br>(n = 469) |                   |         |
|------------------------------------------|--------------------------------|--------------------|---------|-----------------------------------------|--------------------|---------|---------------------------------------|-------------------|---------|
|                                          | Day<br>(n = 1130)              | Night<br>(n = 231) | p-value | Day<br>(740)                            | Night<br>(n = 152) | p-value | Day<br>(390)                          | Night<br>(n = 79) | p-value |
| Complications<br>(overall)               | 12.1%                          | 18.6%              | 0.008   | 7.7%                                    | 11.8%              | 0.09    | 20.5%                                 | 31.6%             | 0.03    |
| Infectious<br>complications<br>(grouped) | 6.8%                           | 10.8%              | 0.04    | 4.2%                                    | 5.9%               | 0.35    | 11.8%                                 | 20.3%             | 0.04    |
| Woundinfection                           | 3.5%                           | 4.8%               | 0.34    | 2.7%                                    | 3.9%               | 0.43#   | 4.9%                                  | 6.3%              | 0.58#   |
| Intra-abdominal<br>abcess                | 3.6%                           | 7.4%               | 0.01    | 1.8%                                    | 3.3%               | 0.21#   | 7.2%                                  | 15.2%             | 0.02    |
| Ileus                                    | 1.7%                           | 2.6%               | 0.42#   | 0.7%                                    | 0.7%               | 1.0#    | 3.6%                                  | 6.3%              | 0.34#   |
| Pneumonia                                | 0.4%                           | 0.4%               | 1.0#    | 0.3%                                    | 0%                 | 1.0#    | 0.5%                                  | 1.3%              | 0.43#   |
| Urinary tract<br>infection               | 0.4%                           | 0%                 | 1.0#    | 0.3%                                    | 0%                 | 1.0#    | 0.5%                                  | 0%                | 1.0#    |
| Bleeding<br>complication                 | 0.5%                           | 0%                 | 0.60#   | 0.3%                                    | 0%                 | 1.0#    | 0.4%                                  | 0%                | 1.0#    |
| Cardiopulmonal<br>failure                | 0.7%                           | 0%                 | 0.37#   | 0%                                      | 0%                 | 1.0#    | 2.1%                                  | 0%                | 0.36#   |
| Death                                    | 0.2%                           | 0%                 | 1.0#    | 0.1%                                    | 0%                 | 1.0#    | 0.3%                                  | 0%                | 1.0#    |
| Other                                    | 0.4%                           | 2.2%               | 0.02#   | 0.3%                                    | 1.3%               | 0.14#   | 0.8%                                  | 3.8%              | 0.06#   |

Numbers are reported in percentages; # Expected count in one of the cells <5, therefore fisherman exact test was performed
